# Supplementary material
Source: Research Square preprint supplement (doi:10.21203/rs.3.rs-8818498/v1)

Supplementary Table 1

List of Sybr green primers used for qPCR

| Gene Name | Forward and Reverse PCR primer sequence |
| --- | --- |
| *ICAM1* | GGTTGAACCCCACAGTCACCTATG  GCTGTAGATGGTCACTGTCTGCAG |
| *IL1A* | AGTGCTGCTGAAGGAGATGCCTGA  CCCCTGCCAAGCACACCCAGTA |
| *IL1B* | TGCACGCTCCGGGACTCACA  CATGGAGAACACCACTTGTTGCTCC |
| *IL6* | AAATTCGGTACATCCTCGACG  TTTCACCAGGCAAGTCTCC |
| *IL8* | GAGTGGACCACACTGCGCCA  TCCACAACCCTCTGCACCCAGT |
| *MMP1* | ATCGGCCCACAAACCCCAAA  TGGCAGTTGTGGCCAGAAAACA |
| *ACTB* | AGAGCTACGAGCTGCCTGAC  AGCACTGTGTTGGCGTACAG |
| *GAPDH* | GAAGGTGAAGGTCGGAGTC  TTGAGGTCAATGAAGGGG |
| *CDKN2A* | CTGCCCAACGCACCGAATAG  CCACCAGCGTGTCCAGGAAG |
| *CDKN1A* | CTGCAGGGGACAGCAGAGG  CCGGCGTTTGGAGTGGTAG |
| *HA-H2A.Z* | ATGGCCTACCCCTACGACGTG  AACCGCCTTTGTCTTGGCCTTTC |
| *H2AZ1* | GGTCCGATTAGCCTTTTCTCTG  AACCGCCTTTGTCTTGGCCTTTC |

Supplementary Figure 1


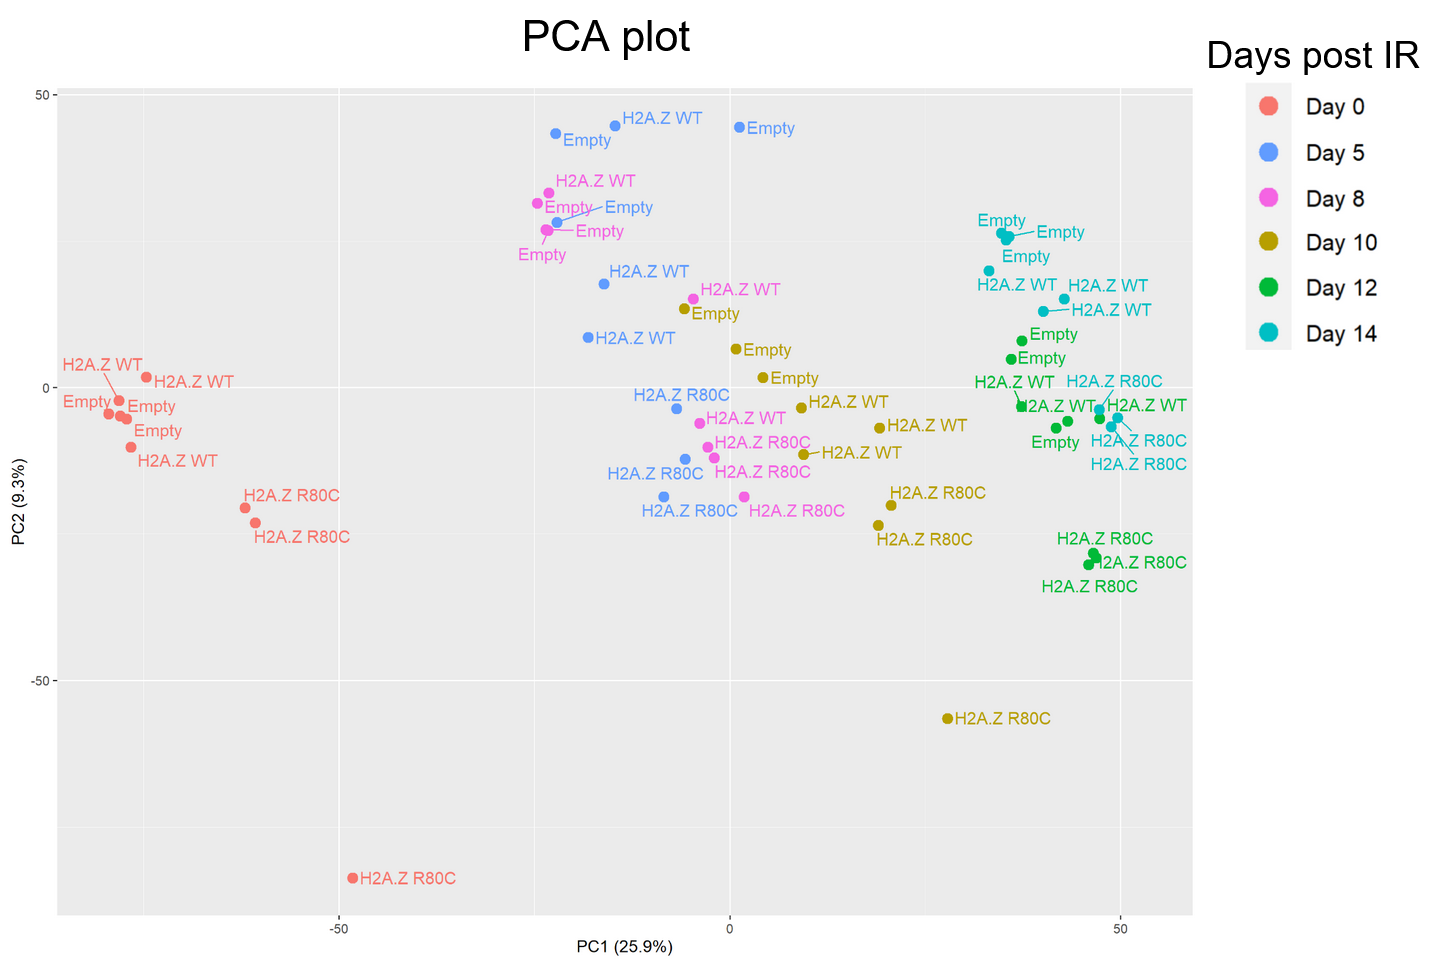


PCA plot showing PC1 and PC2 of bulk RNA-seq samples colored based on days elapsed post irradiation, including percentage of variances explained by the respective primary component

Supplementary Figure 2


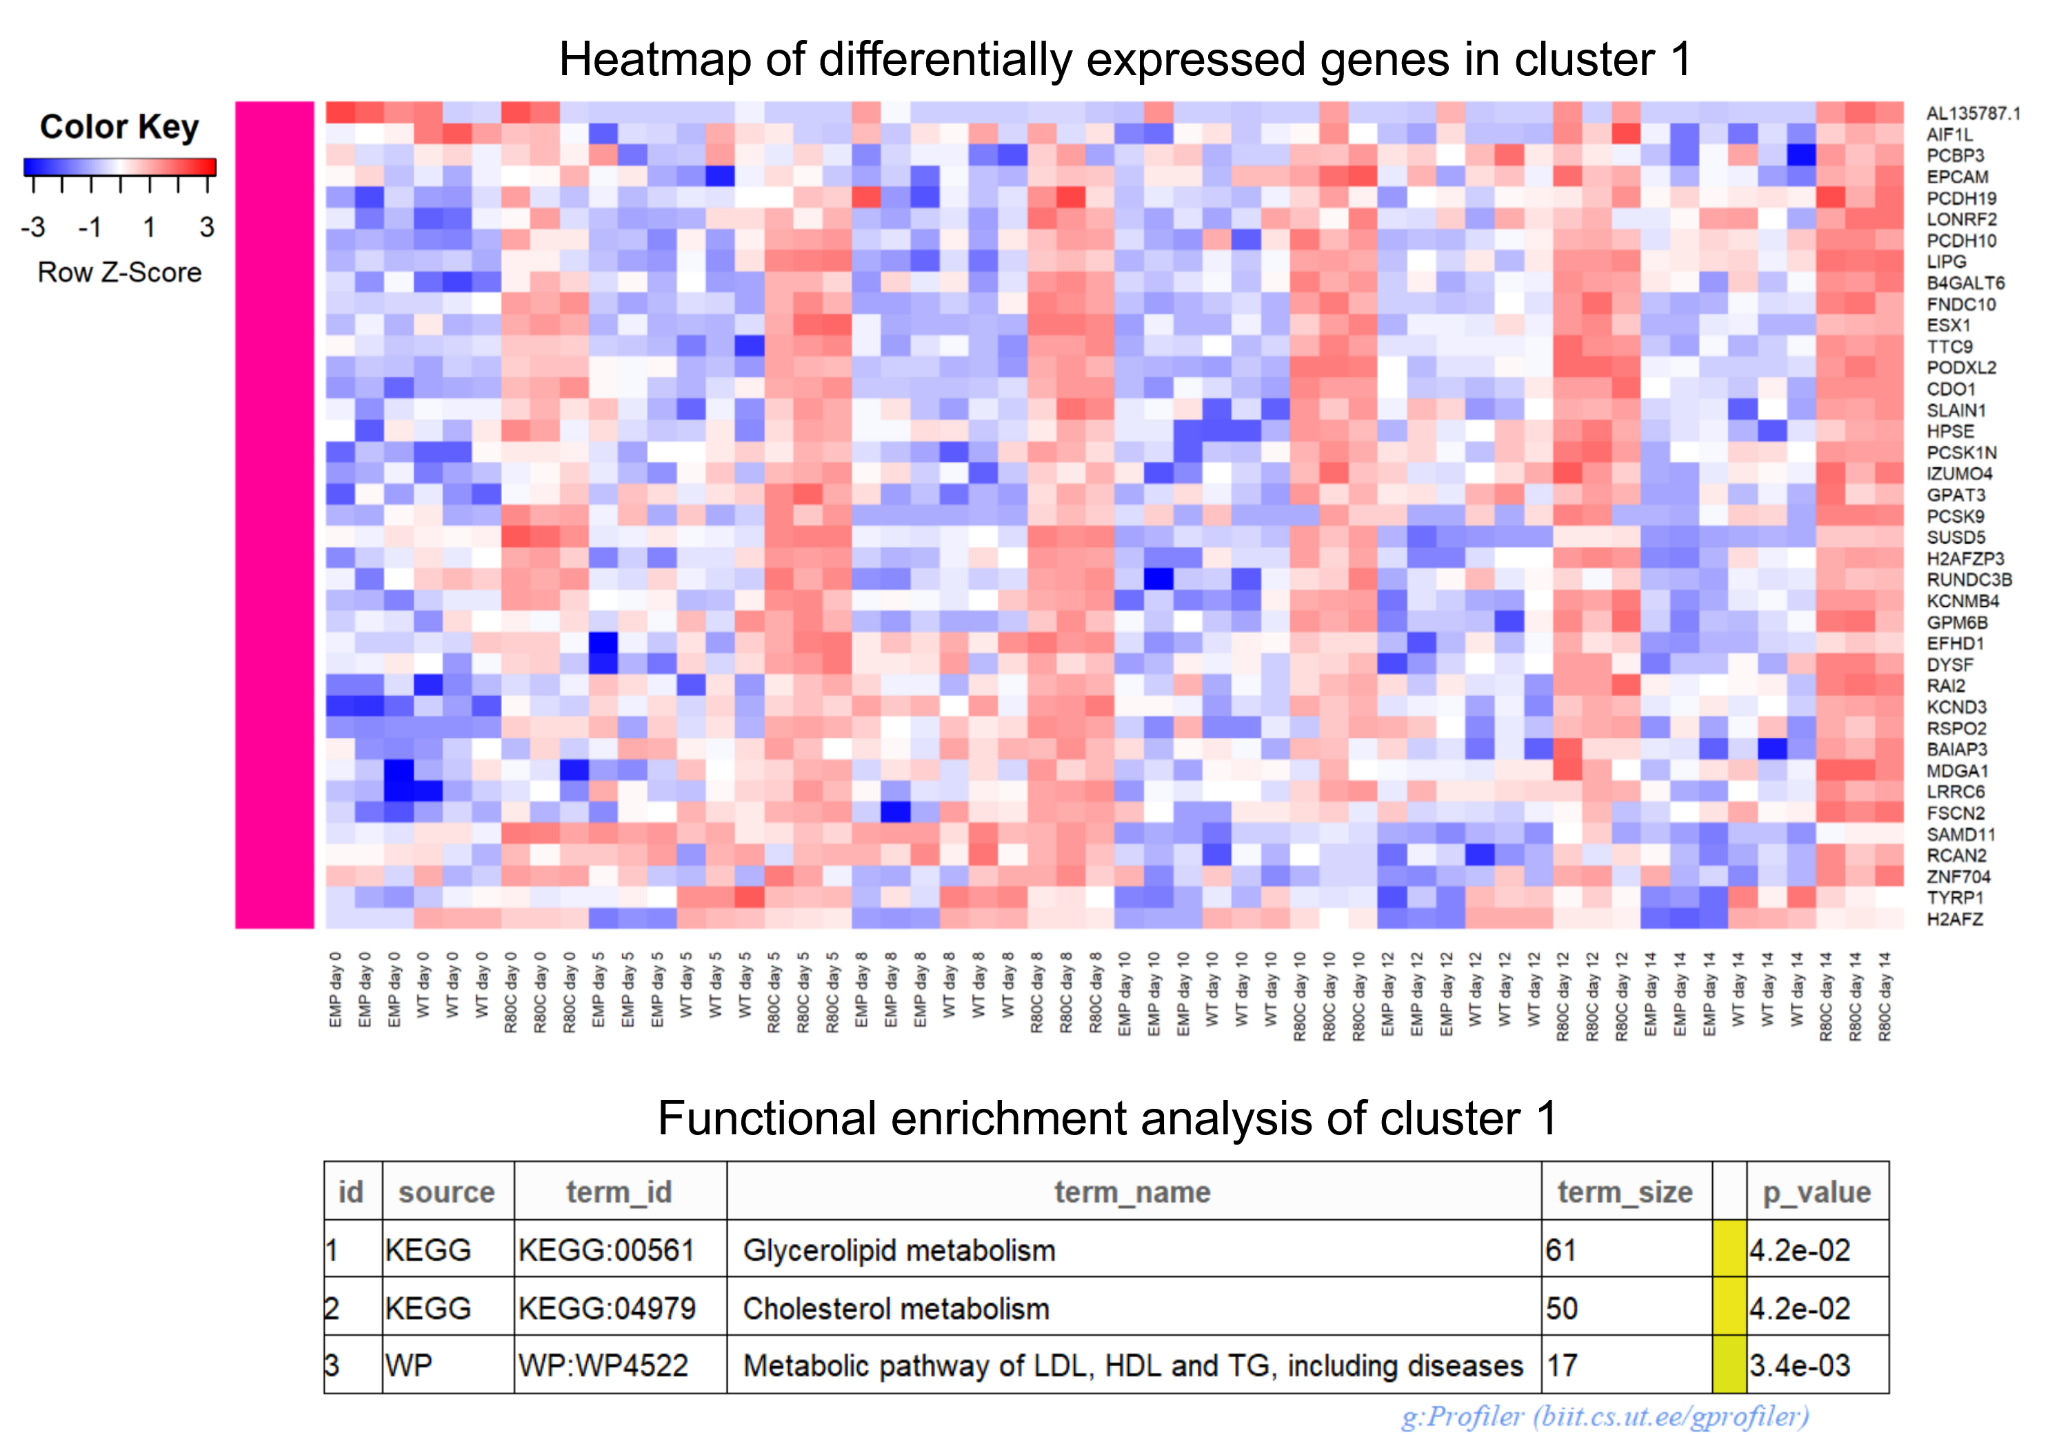


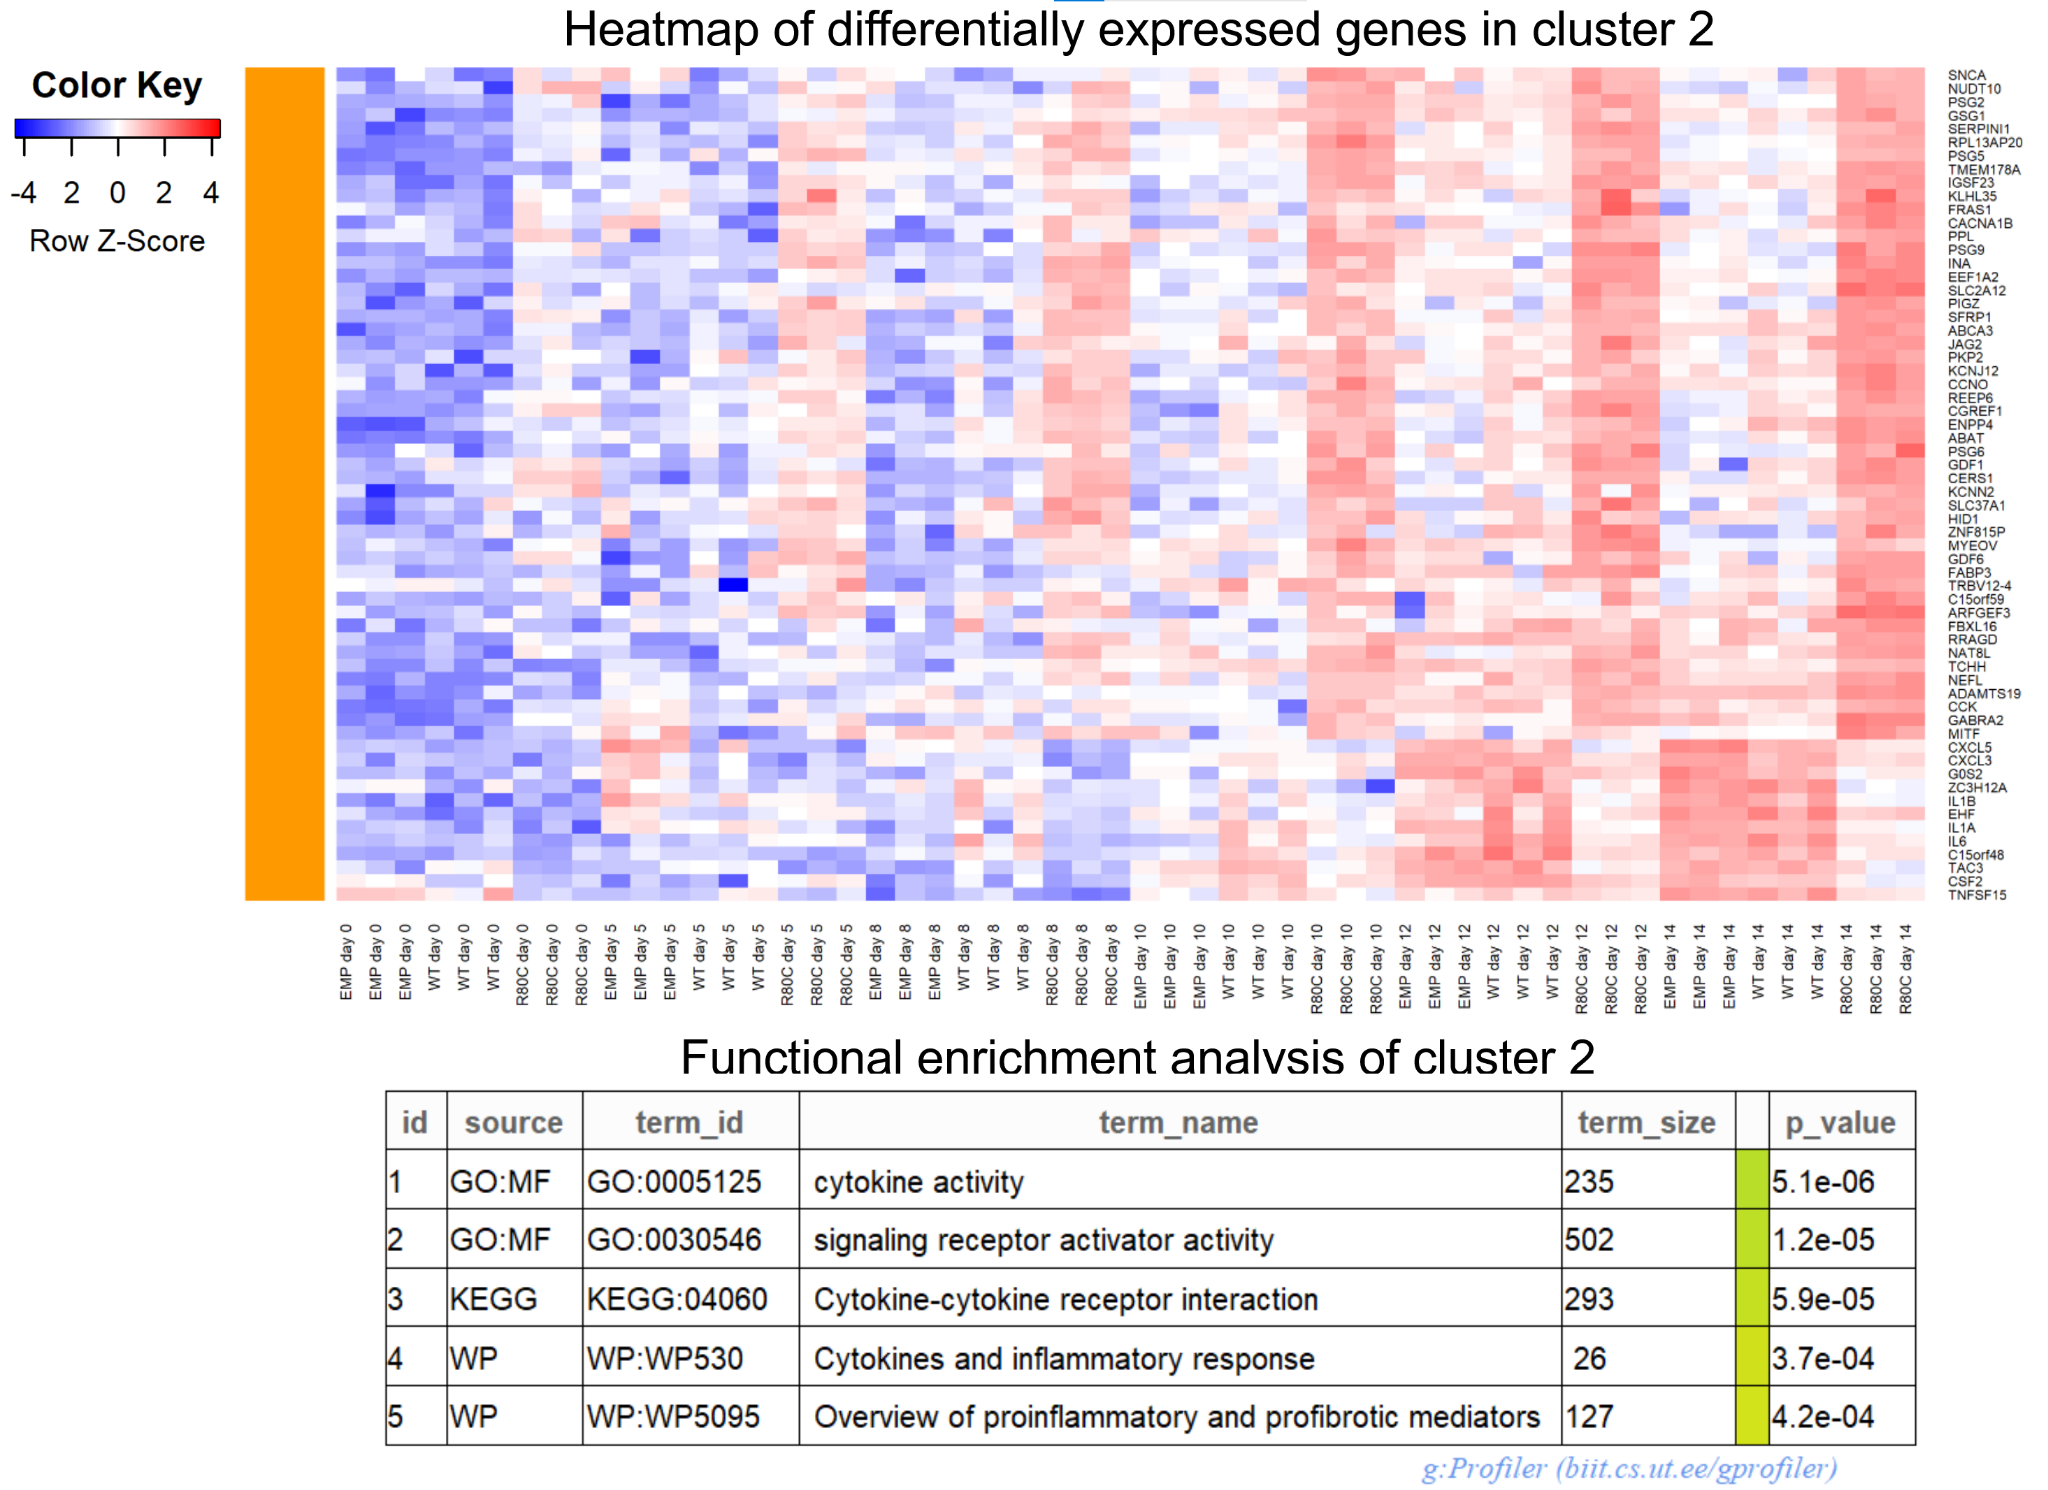


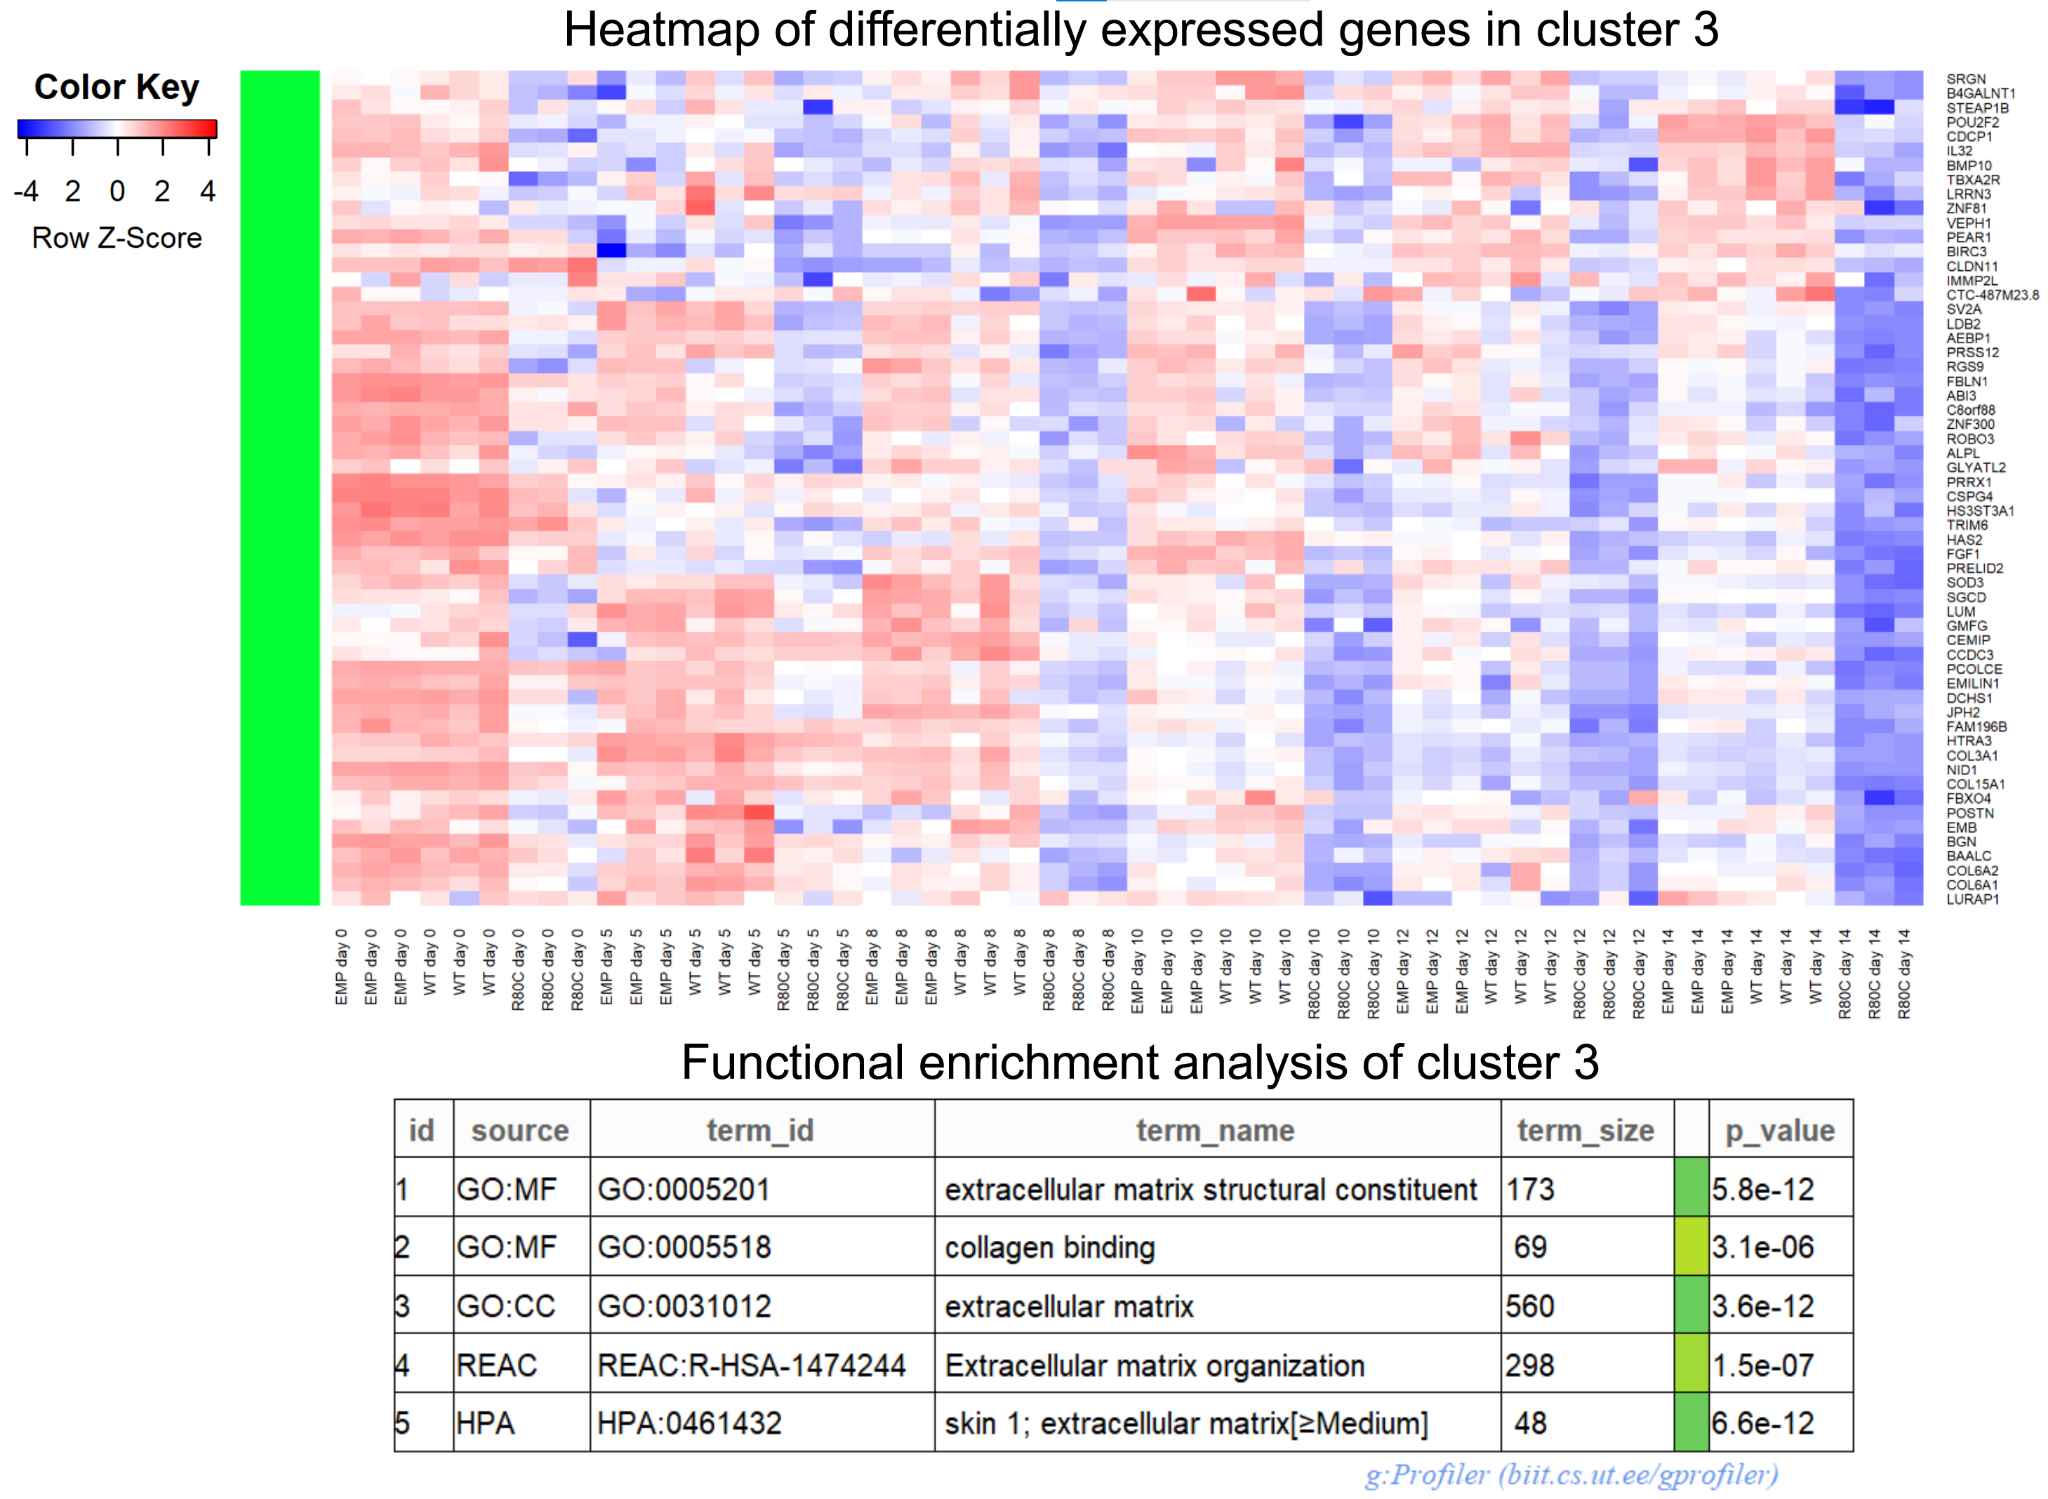

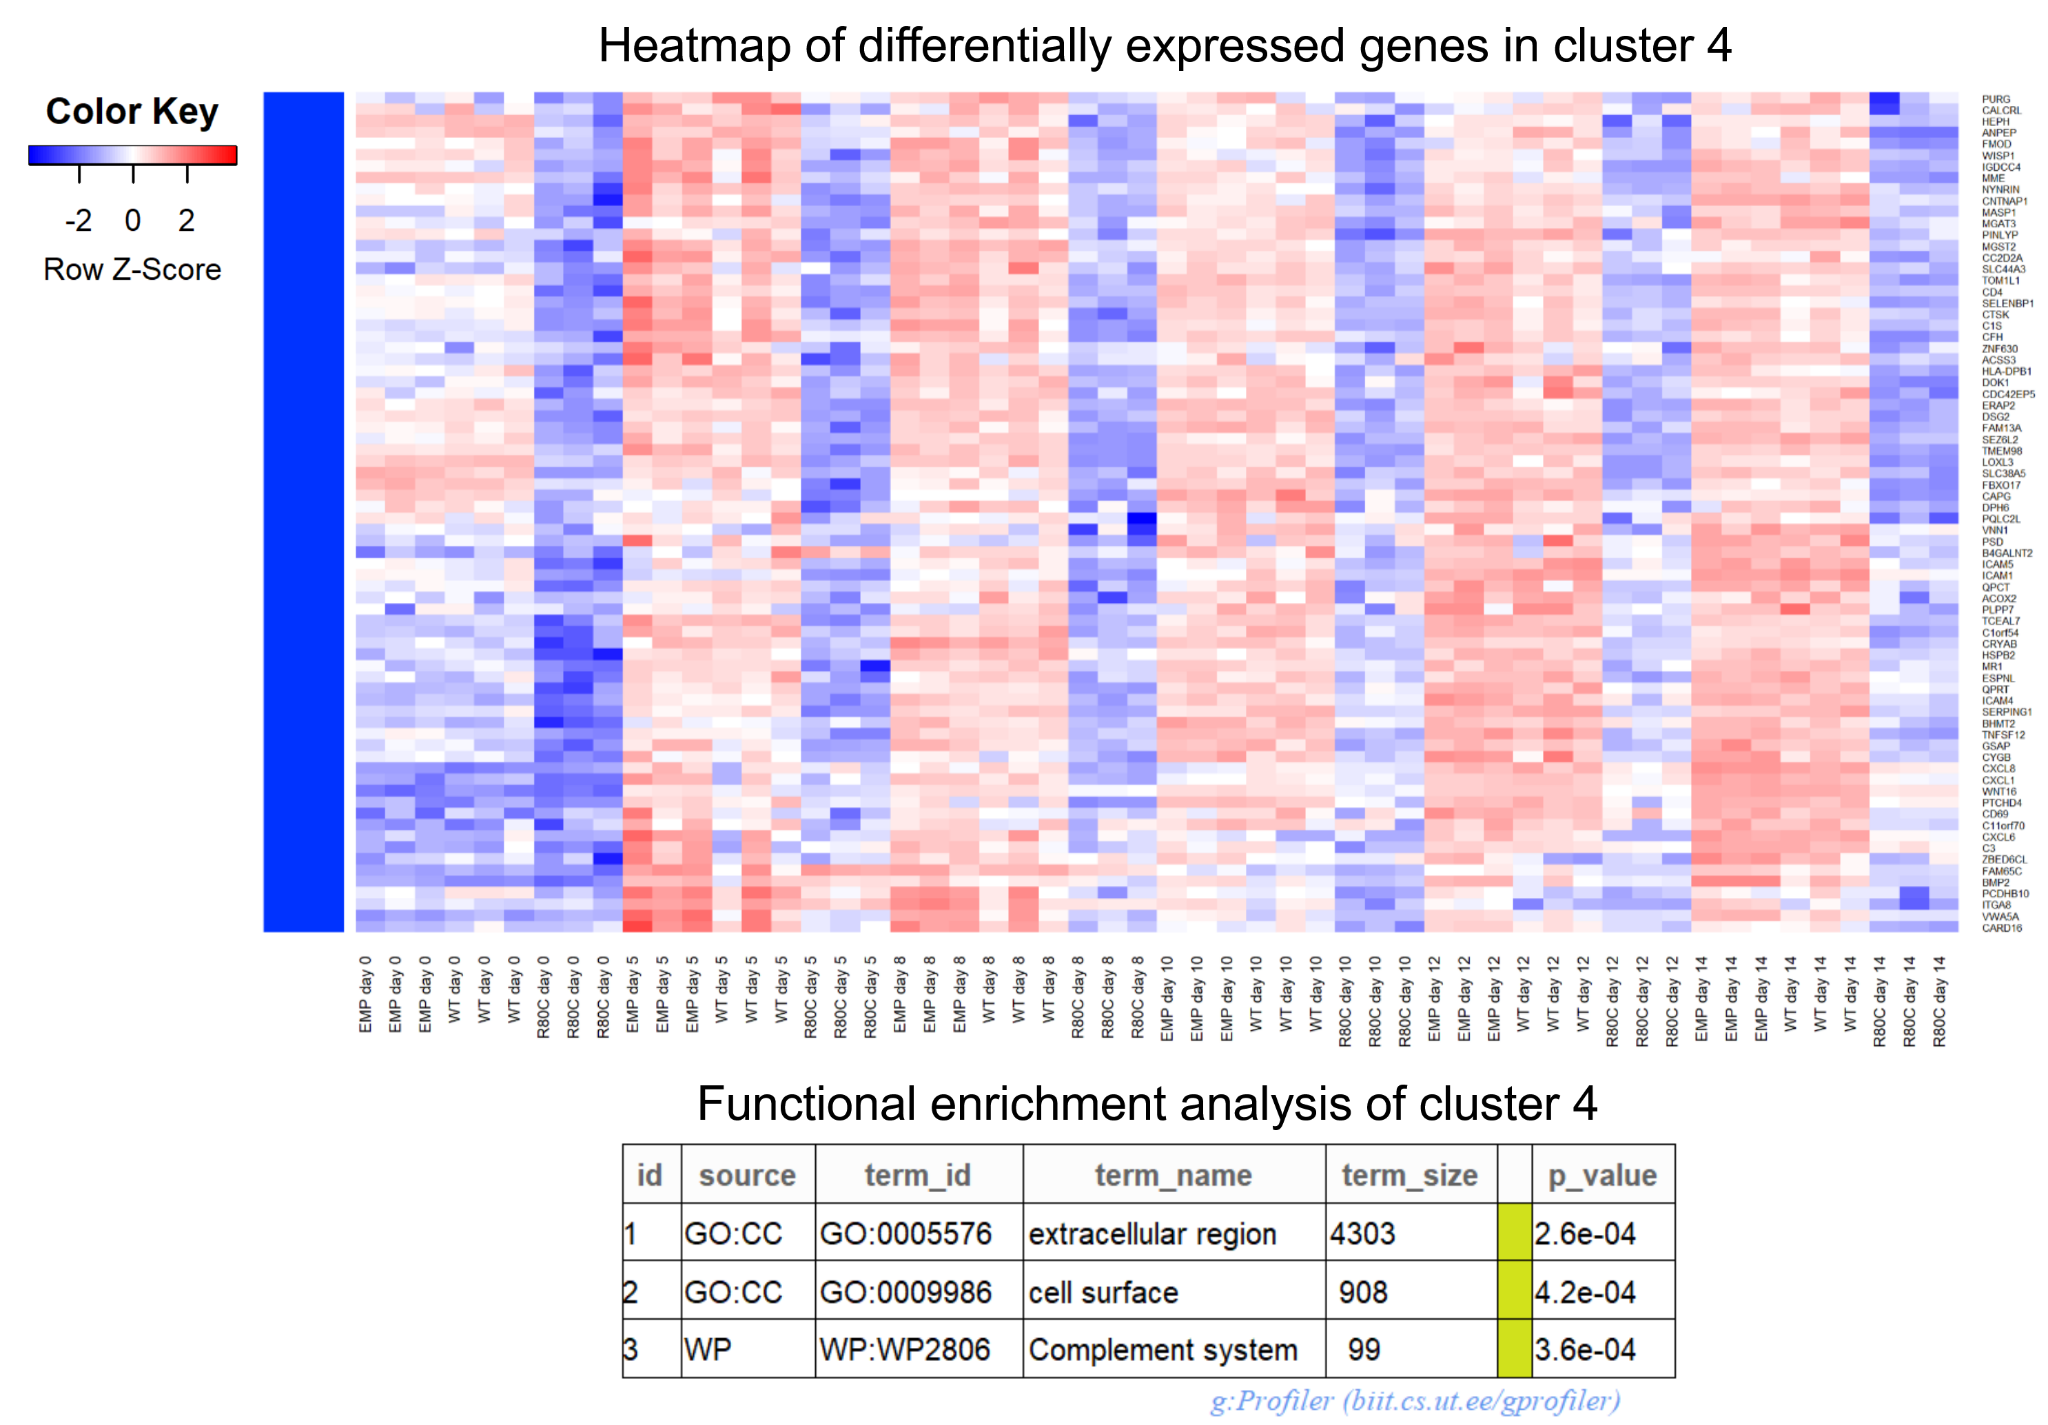


Supplementary Figure 3


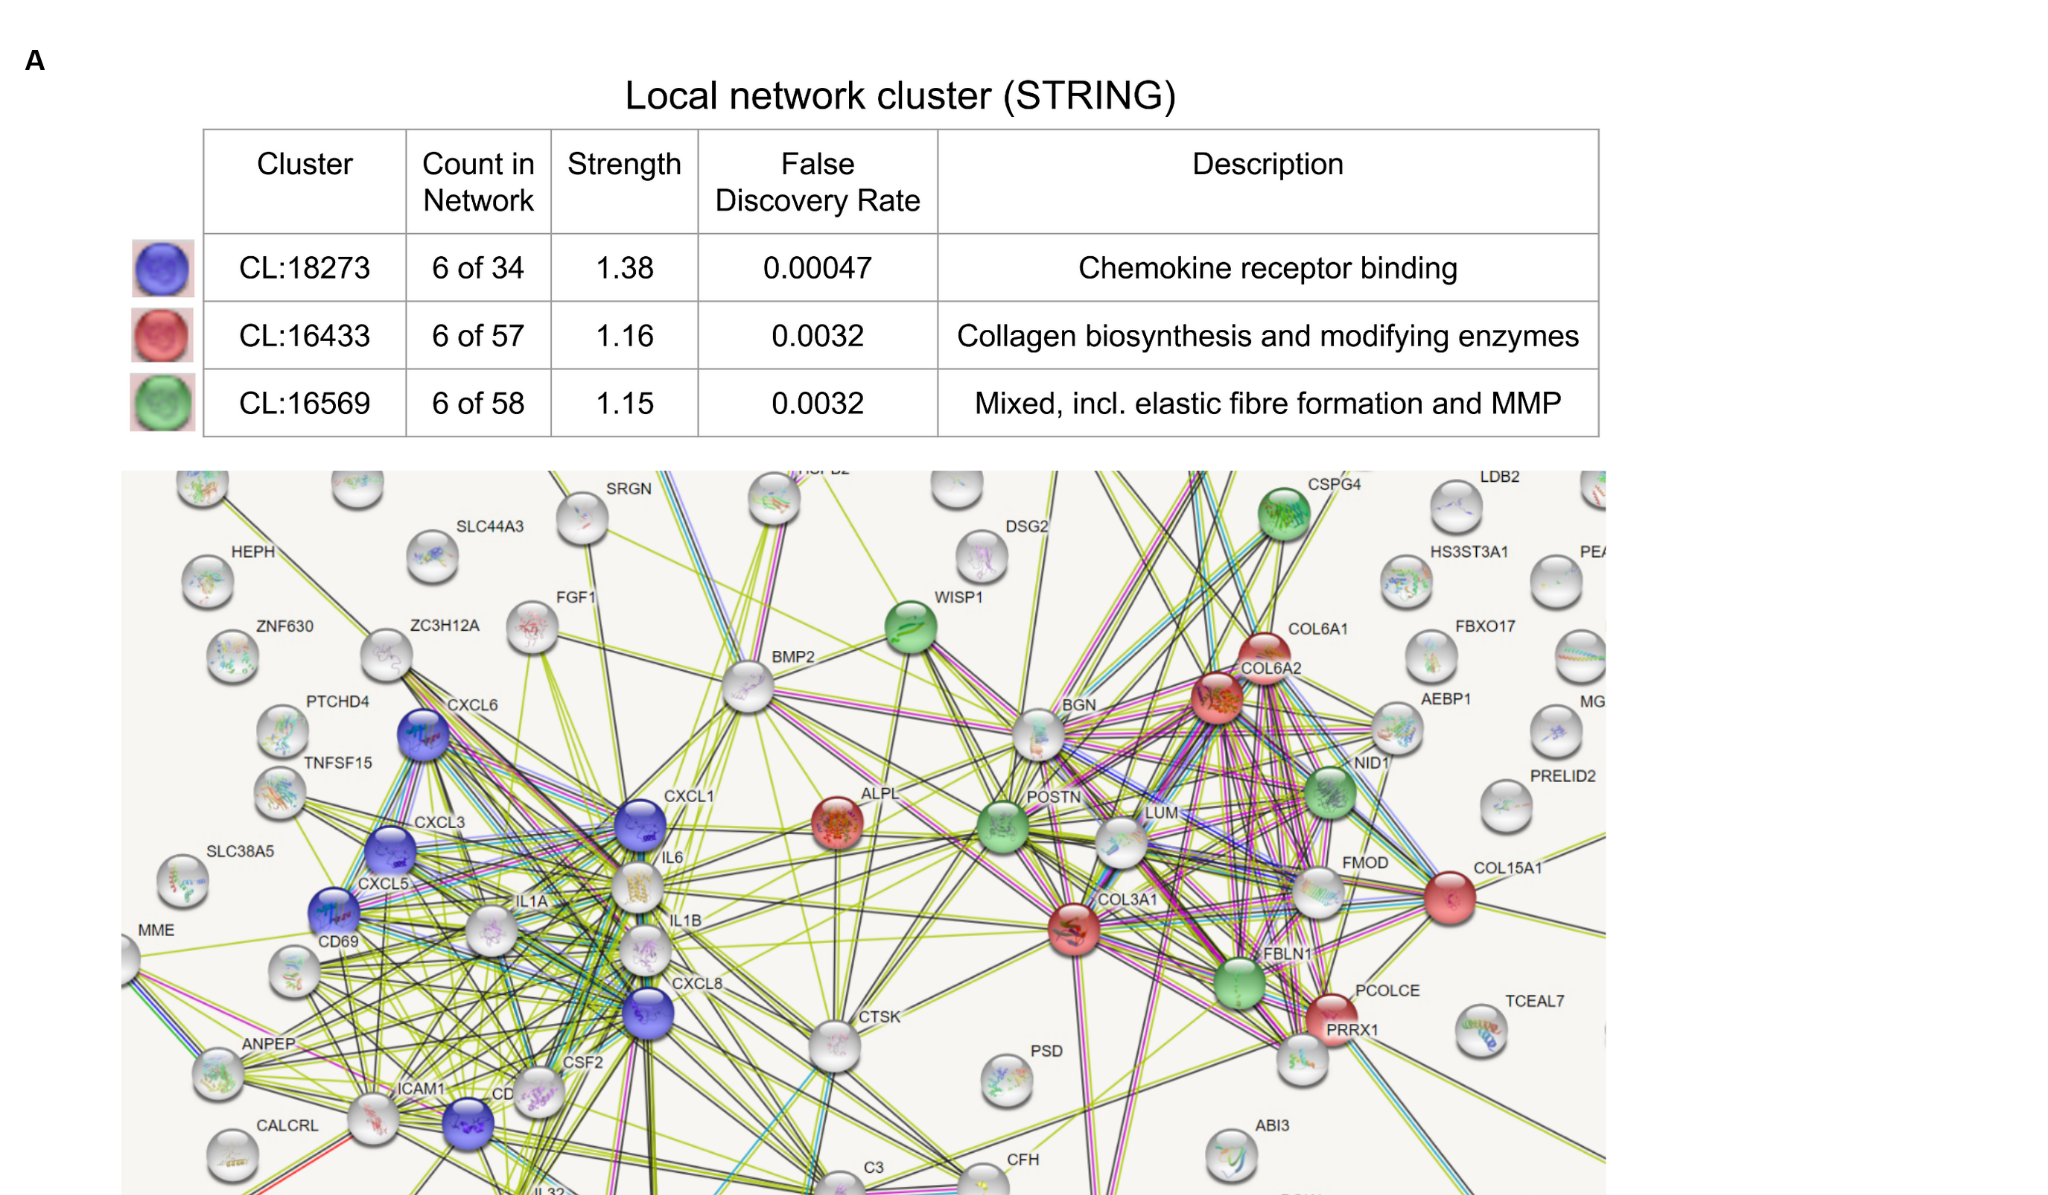


Supplementary Figure 4


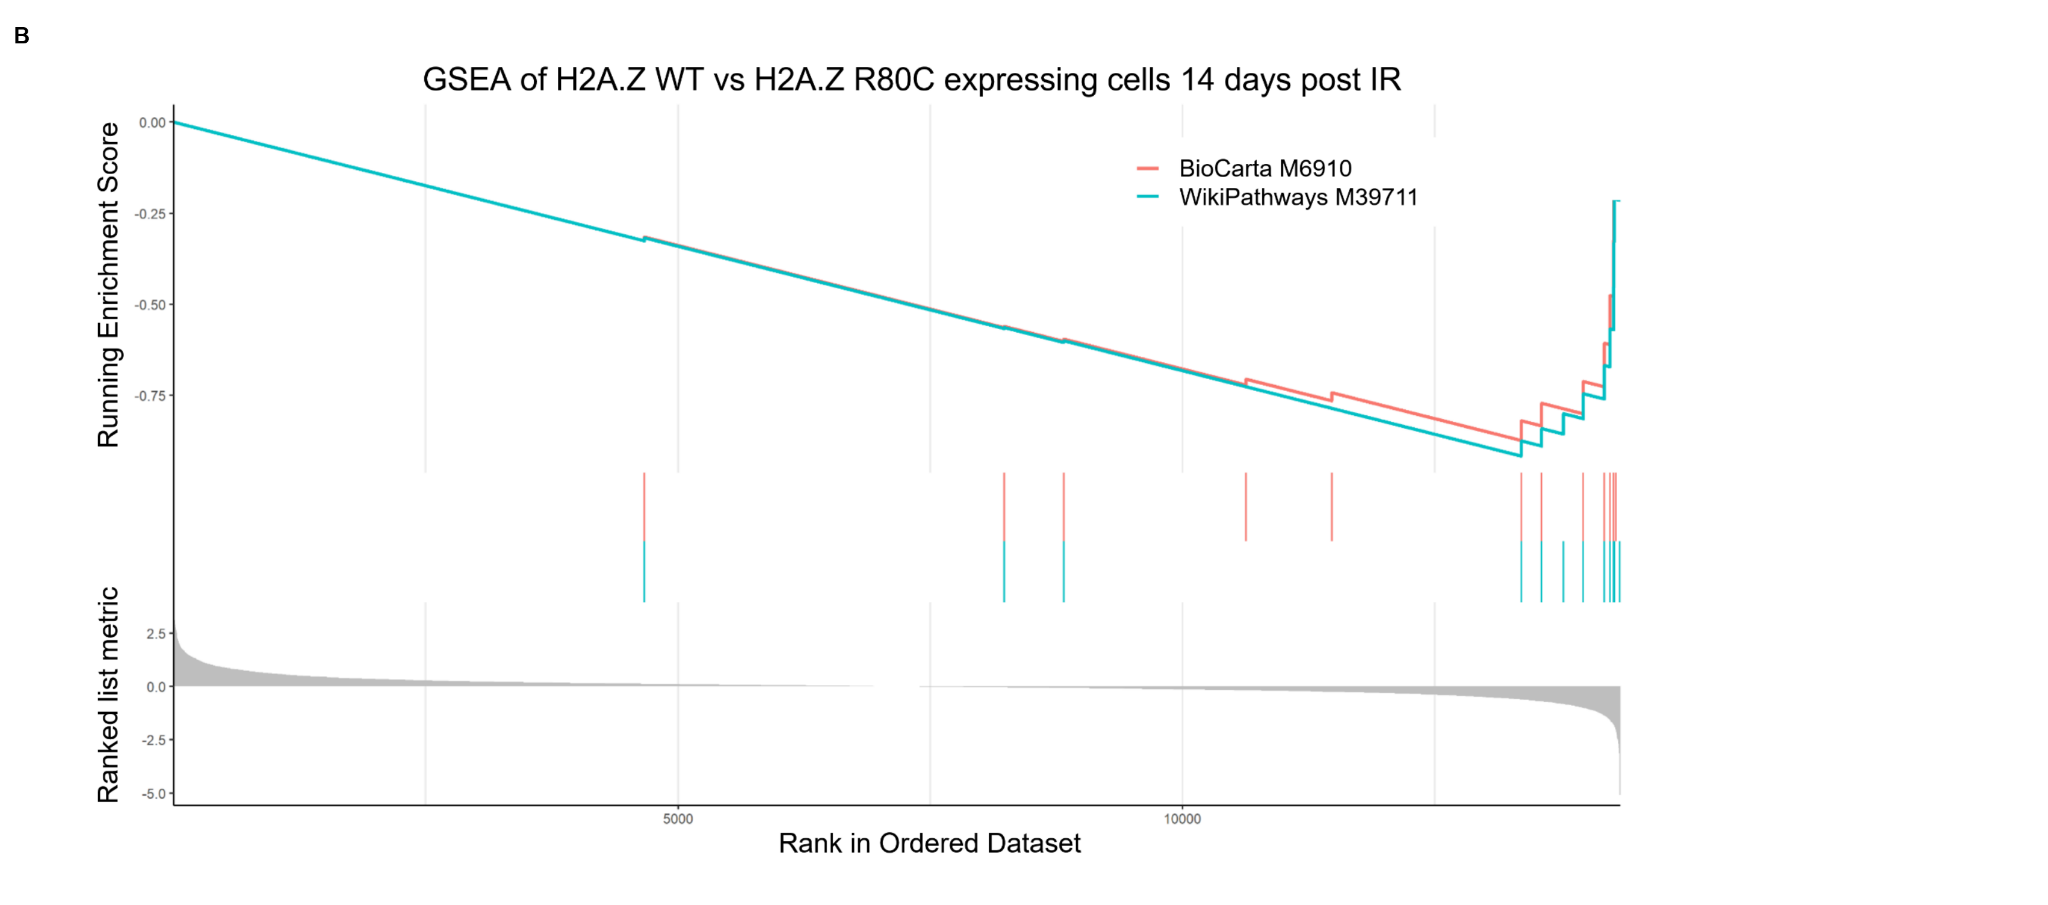


(A) STRING database analysis of genes enriched in H2A.Z WT expressing cells compared to H2A.Z R80C expressing cells at 14 days post irradiation (B) Gene Set Enrichment Analysis shows that genes associated with Cytokines and Inflammatory Response (BioCarta M6910 (BIOCARTA_INFLAM_PATHWAY) and WikiPathways M39711 (WP_CYTOKINES_AND_INFLAMMATORY_RESPONSE)) are strongly enriched in H2A.Z WT expressing cells compared to H2A.Z R80C expressing cells. BioCarta M6910 has an enrichment score of -0.87 and WikiPathways M39711 an enrichment score of -0.92.

Supplementary Figure 5


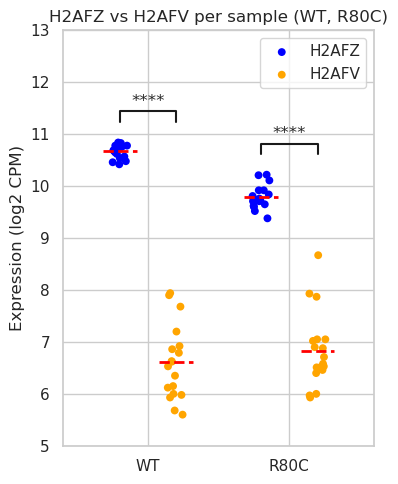


Expression (log2 CPM) of H2AFV and H2AFZ as observed in H2A.Z WT and H2A.Z R80C expressing cells from days 0 to 14 during senescence induction.

Supplementary Figure 6


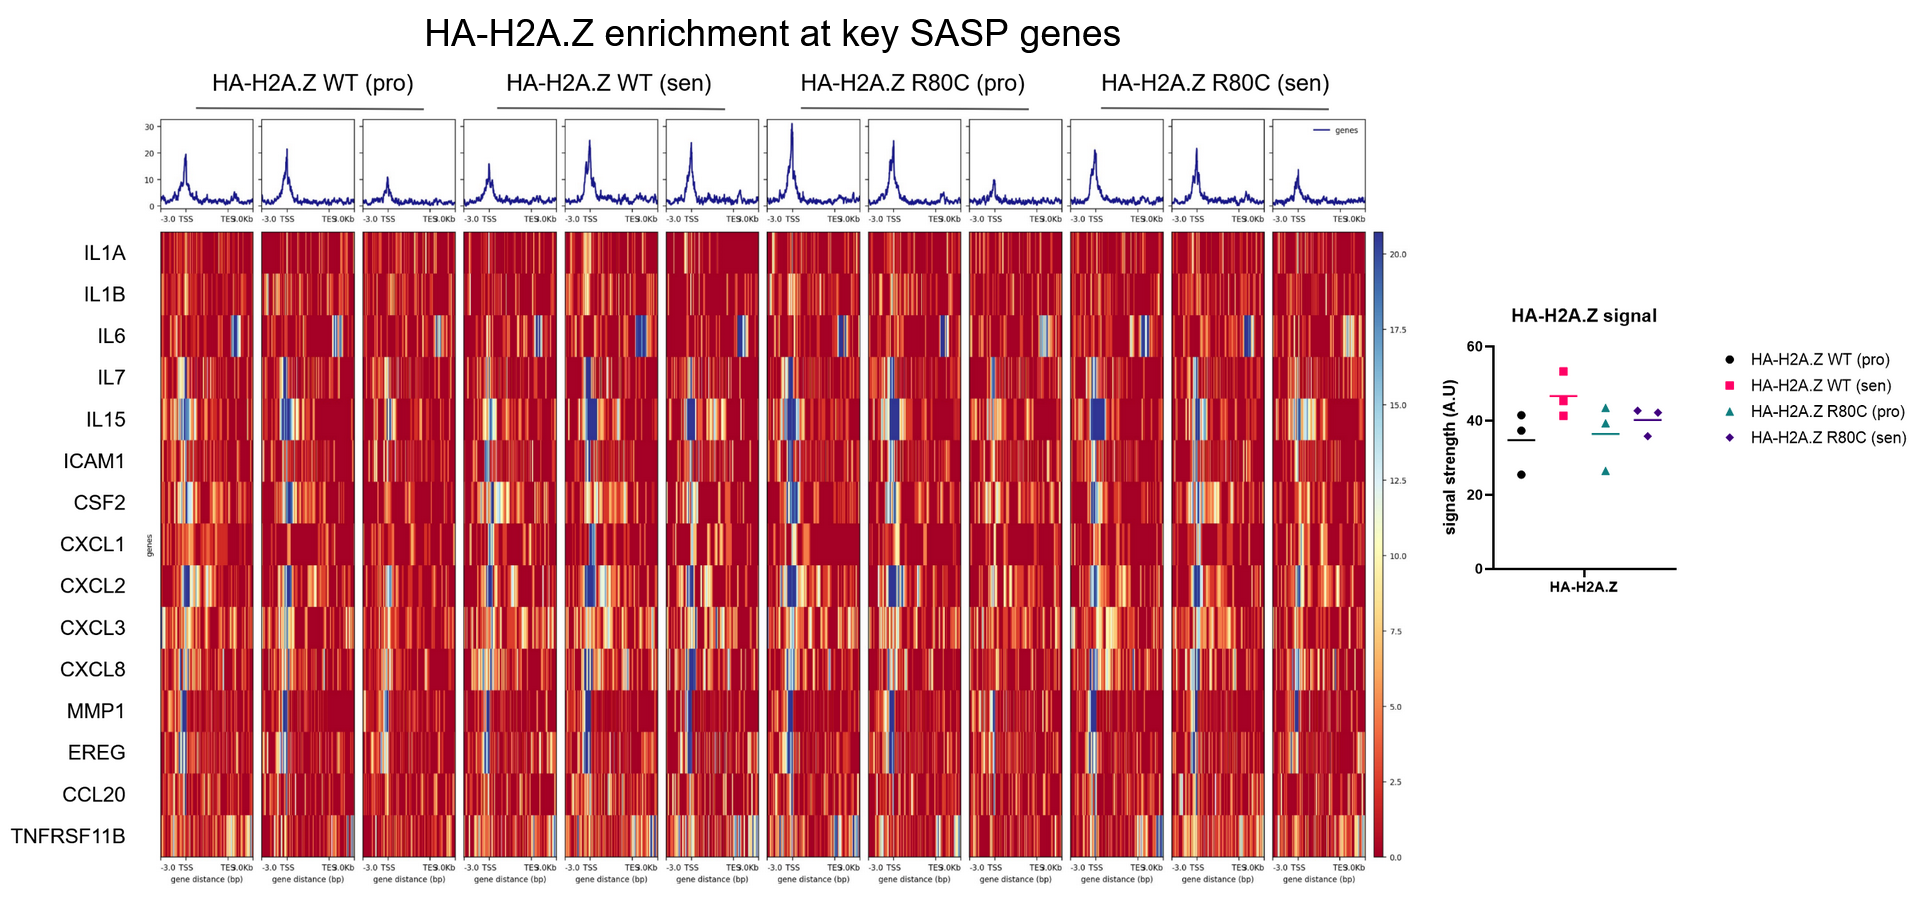

Supplement: Supplementary file 2 [file e524fb1589c71761f68b0d5a.docx]
