# Supplementary material
Source: Research Square preprint supplement (doi:10.21203/rs.3.rs-8818498/v1)

Uncropped gel image for Fig. 1C in “Histone variant H2A.Z mutant suppresses the senescence-associated secretory phenotype”

HA-tag
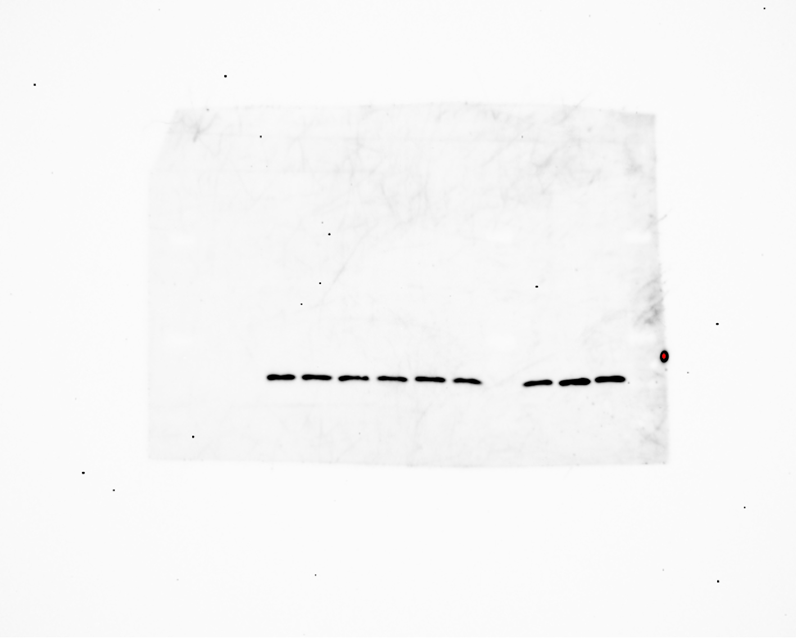

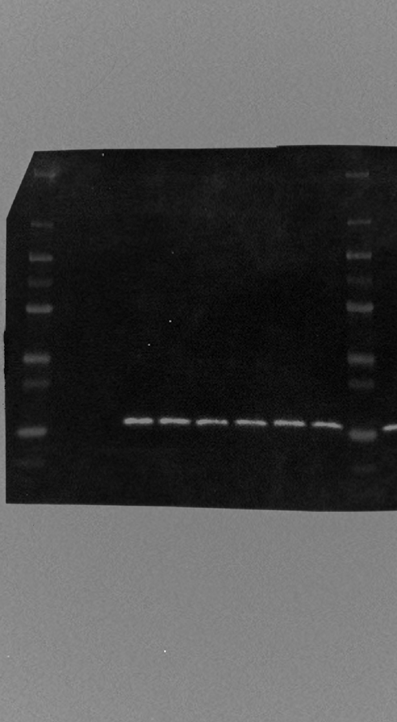


GAPDH


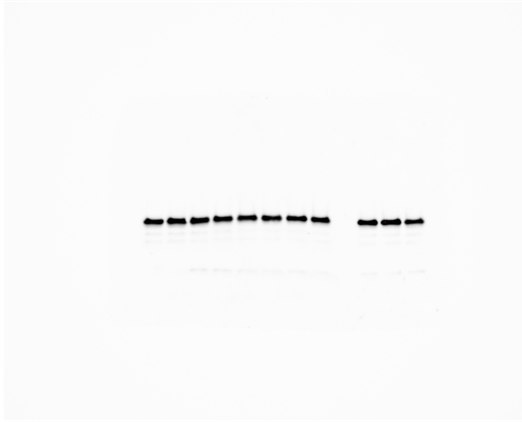

Supplement: Supplementary file 1 [file 84e4863929254f287046546c.docx]
